# Supplementary material for: Stable ultra-fast broad-bandwidth photodetectors based on α-CsPbI3 perovskite and NaYF4:Yb,Er quantum dots
Source: Royal Society of Chemistry journal article supplement (doi:10.1039/c7nr02010d), 2017-01-01
Supplement: c7nr02010d1.pdf [file c7nr02010d1.pdf]

## **Supporting Information**

### **Stable Ultra-Fast Broad Bandwidth Photodetectors based on $\alpha$ -CsPbI<sub>3</sub> Perovskite and NaYF<sub>4</sub>:Yb,Er Quantum Dots**

*Xisheng Zhang*<sup>1,#</sup>, *Qian Wang*<sup>1,#</sup>, *Zhiwen Jin*<sup>1,\*</sup>, *Jingru Zhang*<sup>1</sup>, and *Shengzhong  
(Frank) Liu*<sup>1,2,\*</sup>

<sup>#</sup>These authors contributed equally to this work

<sup>1</sup>Key Laboratory of Applied Surface and Colloid Chemistry, National Ministry of Education; Shaanxi Key Laboratory for Advanced Energy Devices; Shaanxi Engineering Lab for Advanced Energy Technology, School of Materials Science and Engineering, Shaanxi Normal University, Xi'an 710119, China.

E-mail: jinzhiwen@snnu.edu.cn, liusz@snnu.edu.cn

<sup>2</sup>Department of Physics and Electronic Engineering, Yuncheng University, Yuncheng 044000, China.

<sup>3</sup>Dalian National Laboratory for Clean Energy; iChEM, Dalian Institute of Chemical Physics, Chinese Academy of Sciences, Dalian, 116023, China.

Keywords: photodetector,  $\alpha$ -CsPbI<sub>3</sub>, quantum dot, NaYF<sub>4</sub>:Yb,Er, stability

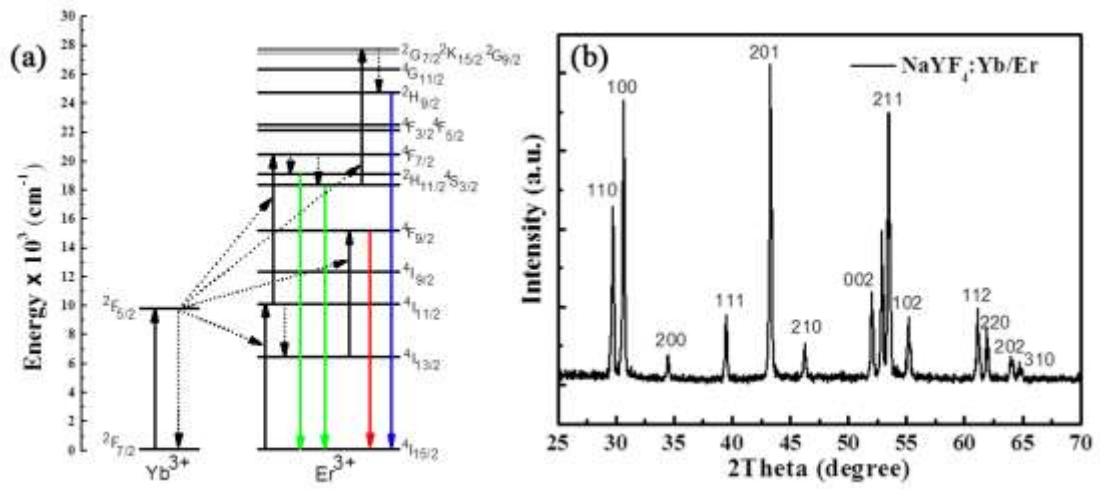

**Figure S1** (a) Energy level diagram of Ln<sup>3+</sup> (Yb<sup>3+</sup>, Er<sup>3+</sup>), (b) XRD patterns of 2.0 mol. % Er<sup>3+</sup>, 20 mol. % Yb<sup>3+</sup> co-doped NaYF<sub>4</sub>.

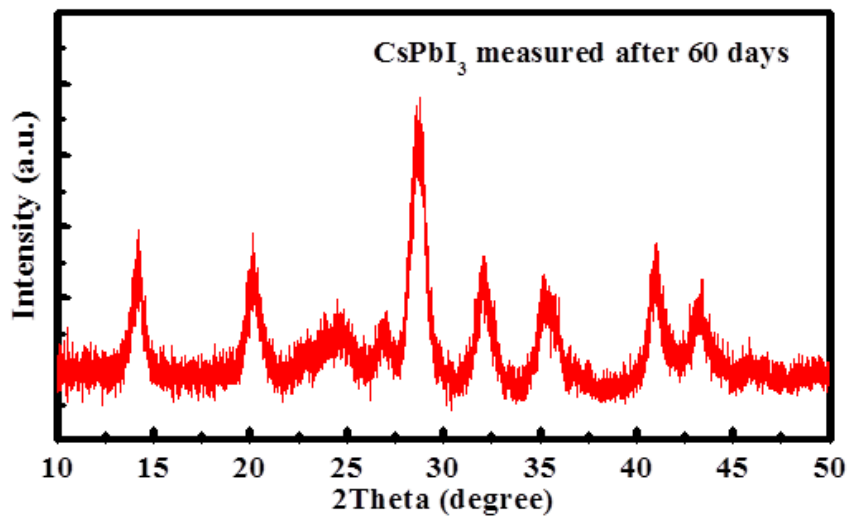

**Figure S2** XRD patterns of α-CsPbI<sub>3</sub> QDs after 60 days.

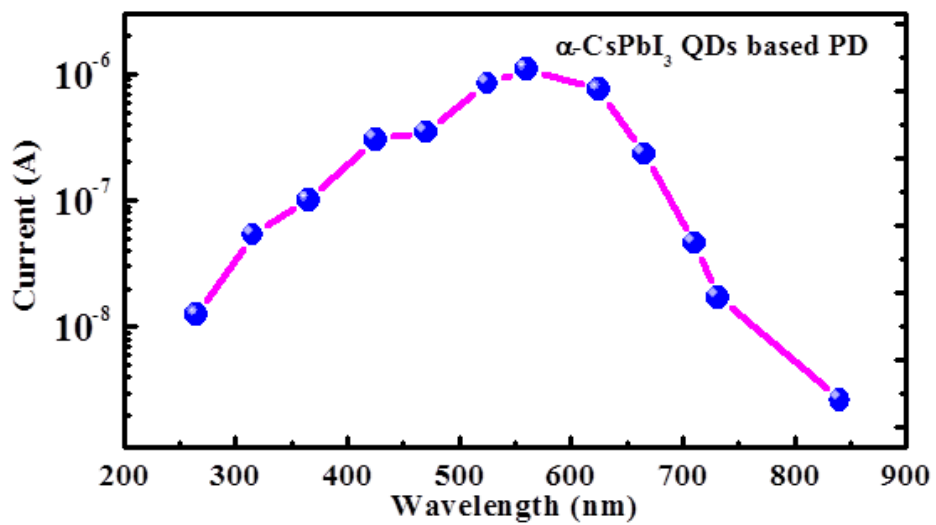

**Figure S3** Photocurrent spectrum of the  $\alpha$ -CsPbI<sub>3</sub> QDs based PD.

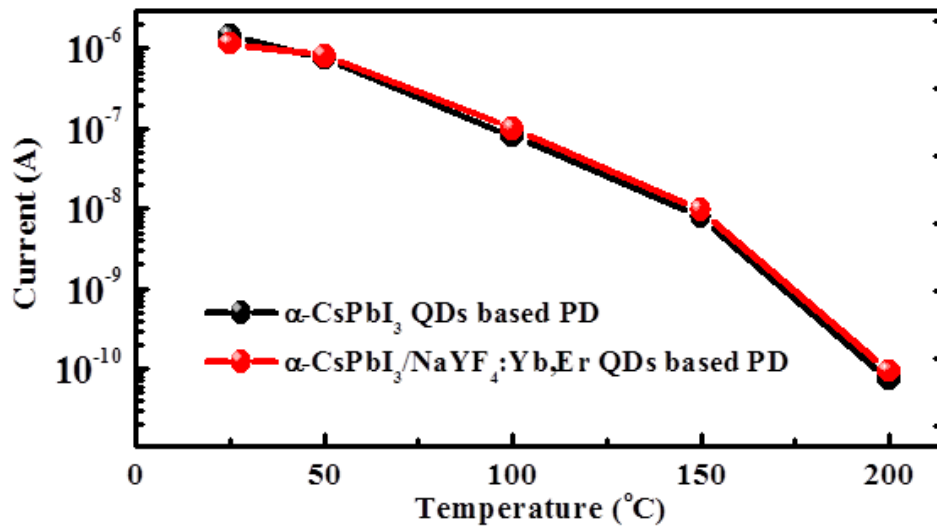

**Figure S4** Photocurrent as a function of annealing temperature for  $\alpha$ -CsPbI<sub>3</sub> QDs based PD and  $\alpha$ -CsPbI<sub>3</sub>/NaYF<sub>4</sub>:Yb,Er QDs based PD.
